# Supplementary material for: Condom effectiveness against non-viral sexually transmitted infections: a prospective study using electronic daily diaries
Source: HighWire-hosted journal article supplement (doi:10.1136/sextrans-2012-050618), 2012-09-21
Supplement: sextrans-2012-050618_Spanish_abstract.pdf [file sextrans-2012-050618_Spanish_abstract.pdf]

**Condom effectiveness against non-viral sexually transmitted infections: a prospective study using electronic daily diaries**

**SPANISH ABSTRACT**

**Efectividad del Condón contra las infecciones no-virales de transmisión sexual: un estudio prospectivo utilizando registros diarios electrónicos**

**RESUMEN**

**Objetivos:** Evaluar de manera prospectiva el nivel de protección que se deriva del uso consistente y correcto de los condones de látex para evitar contraer infecciones causadas por *Chlamydia trachomatis*, *Neisseria gonorrhoeae* y *Trichomonas vaginalis*.

**Métodos:** Se hizo seguimiento prospectivo hasta por 6 meses a pacientes (N=929) que asisten a clínicas que atienden infecciones de transmisión sexual (ITS). Se hizo exámenes de ITS mediante amplificación de ácido nucleico en orina al inicio, a los 3 meses y a los 6 meses. Se instruyó a los participantes para que respondieran preguntas diarias a través de un dispositivo móvil para completar un reporte luego de cada encuentro sexual pene-vagina. El examen se hizo con modelos de ecuaciones de estimación generalizada de la asociación del uso consistente, así como consistente y correcto, del condón con la incidencia de ITS en intervalos de 3 meses.

**Resultados:** El uso consistente del condón no estuvo significativamente asociado con la incidencia de ITS (Estimado OR (EOR)=0.75; 95% CI (CI) 0.43 a 1.30; p=0.31). Sin embargo, se estimó que los individuos que usaron los condones tanto de manera correcta como consistente corrieron 59% menos riesgo de contraer una ITS (EOR=0.41; 95% CI 0.19 a 0.90; p=.026), en comparación con los que no lo hicieron.

**Conclusiones:** El uso correcto y a la vez consistente de condones reduce drásticamente el riesgo de contraer ITS no-virales.

**A Spanish version of the full text of this article is available to members of IUSTI Latin America/ALACITS via the members' area of the ALACITS website at [www.alacits.org](http://www.alacits.org).**
